# Supplementary material for: Different Contacted Cell Types Contribute to Acquiring Different Properties in Brain Microglial Cells upon Intercellular Interaction
Source: MDPI journal article supplement (doi:10.3390/ijms24021774), 2023-01-16
Supplement: s1 [file s1]

**Supplementary Figure S1.** Pathway analysis of the cell cycle-related genes between MGs alone and MGs cocultured with ACs.

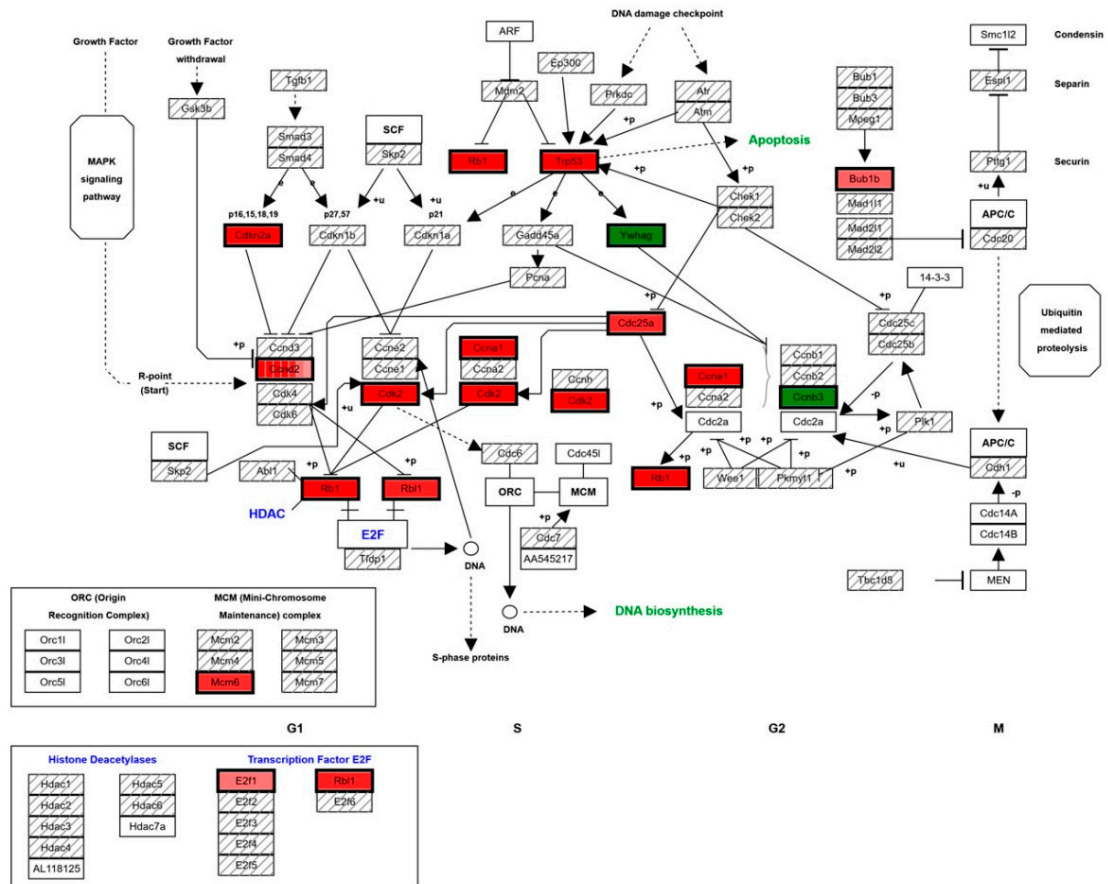

**Supplementary Figure S2.** Pathway analysis of the cell cycle-related genes between MGs alone and MGs cocultured with PCs.

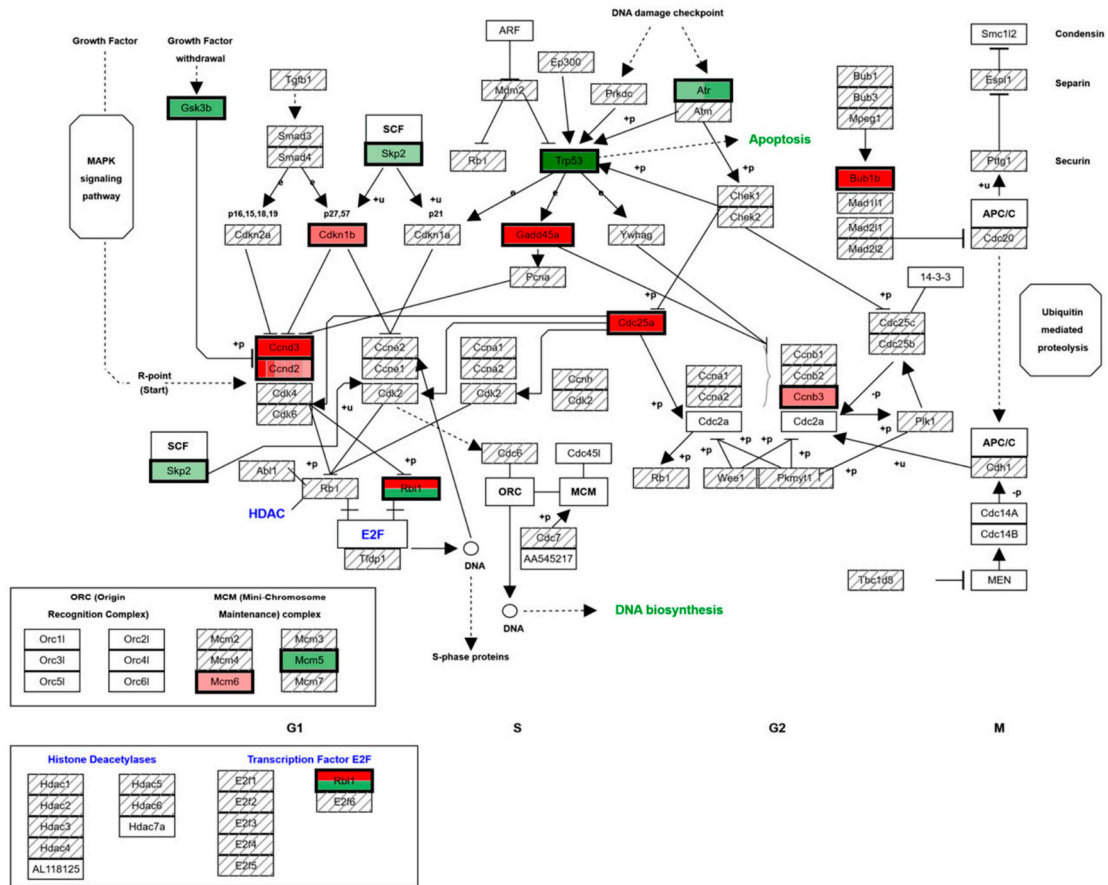

**Supplementary Figure S3.** Pathway analysis of the cell cycle-related genes between MGs alone and MGs cocultured with ECs.

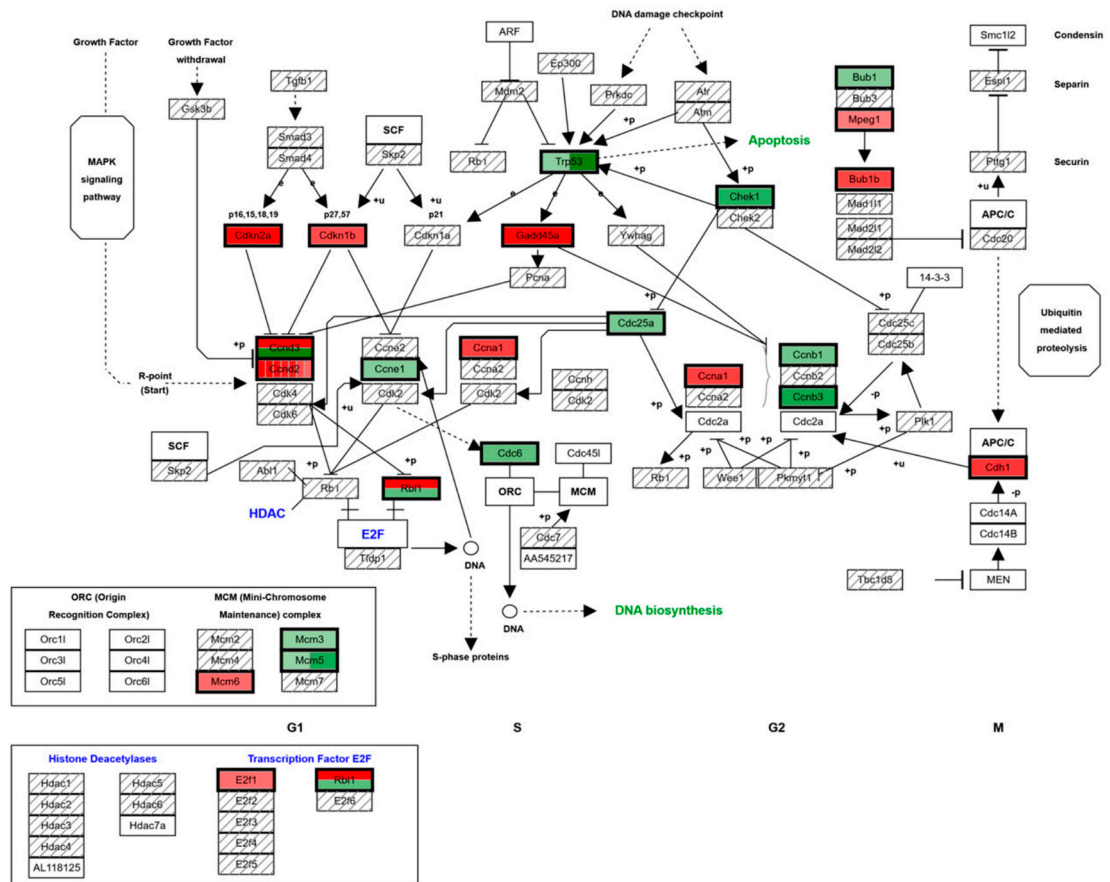

**Supplementary Figure S4.** Pathway analysis of the apoptosis-related genes between MGs alone and MGs cocultured with ACs.

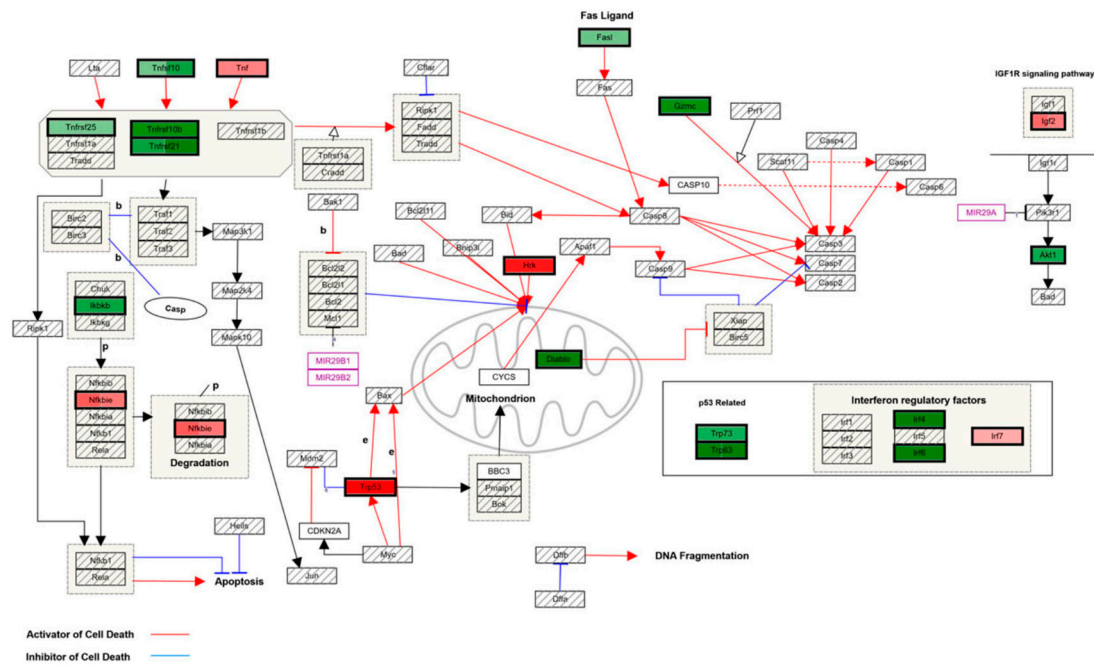

**Supplementary Figure S5.** Pathway analysis of the apoptosis-related genes between MGs alone and MGs cocultured with PCs.

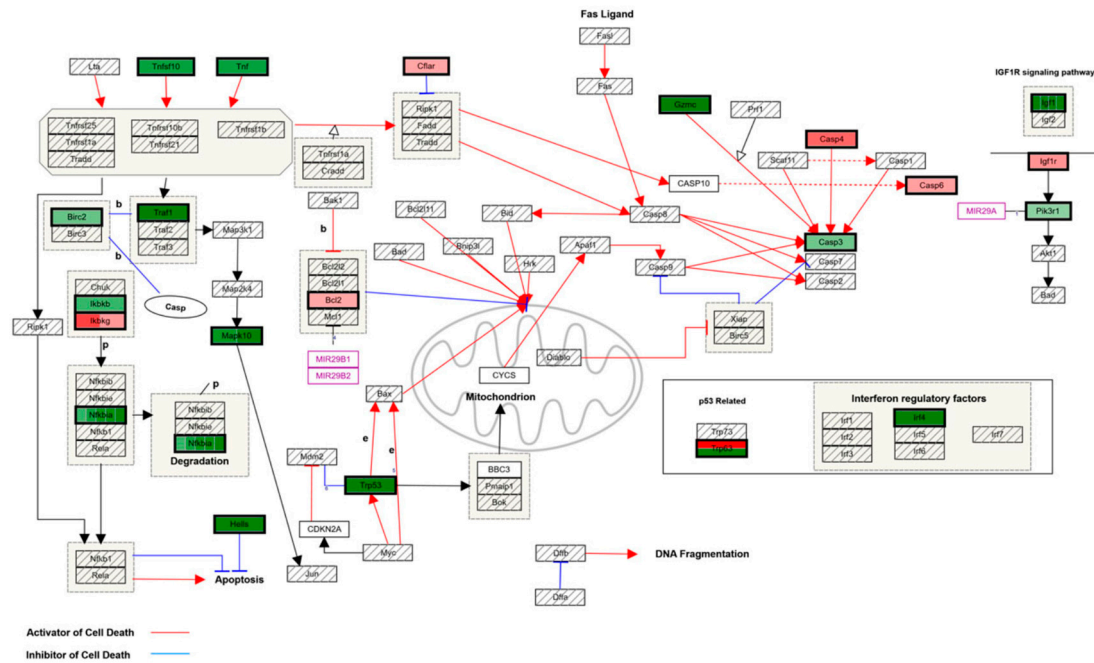

**Supplementary Figure S6.** Pathway analysis of the apoptosis-related genes between MGs alone and MGs cocultured with ECs.

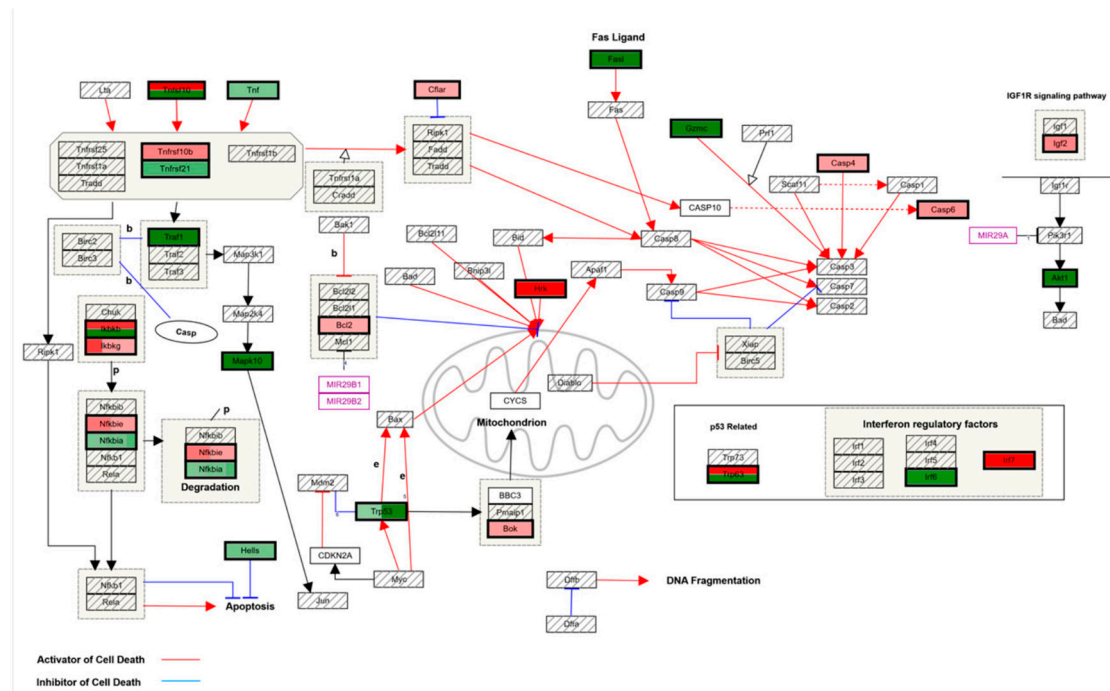

Supplementary Table S1

Comparison of cell cycle-related gene expressions between MGs with ACs and MGs alone  
(MGs with ACs/MGs alone)

| Gene symbol | Gene name                                                                                    | ID           | Fold change |
|-------------|----------------------------------------------------------------------------------------------|--------------|-------------|
| Bub1b       | budding uninhibited by benzimidazoles 1 homolog,<br>beta (S. cerevisiae)                     | 1447362_at   | 2.84        |
| Ccn1        | cyclin A1                                                                                    | 1449177_at   | 5.45        |
| Ccnb3       | cyclin B3                                                                                    | 1427744_at   | -3.82       |
| Cnd2        | cyclin D2                                                                                    | 1430127_a_at | 2.29        |
| Cdc25a      | cell division cycle 25A                                                                      | 1445995_at   | 3.46        |
| Cdk2        | cyclin-dependent kinase 2                                                                    | 1447617_at   | 6.94        |
| Cdkn2a      | cyclin-dependent kinase inhibitor 2A                                                         | 1450140_a_at | 6.7         |
| E2f1        | E2F transcription factor 1                                                                   | 1447840_x_at | 2.65        |
| Mcm6        | minichromosome maintenance deficient 6<br>(MIS5 homolog, S. pombe) (S. cerevisiae)           | 1447756_x_at | 3.44        |
| Rb1         | retinoblastoma 1                                                                             | 1444400_at   | 4.19        |
| Rbl1        | retinoblastoma-like 1 (p107)                                                                 | 1432605_at   | 3.59        |
| Trp53       | transformation related protein 53                                                            | 1459780_at   | 4.17        |
| Ywhag       | tyrosine 3-monooxygenase/tryptophan 5-monooxygenase<br>activation protein, gamma polypeptide | 1459693_x_at | -17.67      |

Supplementary Table S2

Comparison of cell cycle-related gene expressions between MGs with PCs and MGs alone  
(MGs with PCs/MGs alone)

| Gene symbol | Gene name                                                                          | ID           | Fold change |
|-------------|------------------------------------------------------------------------------------|--------------|-------------|
| Atr         | ataxia telangiectasia and Rad3 related                                             | 1438921_at   | -2.67       |
| Bub1b       | budding uninhibited by benzimidazoles 1 homolog,<br>beta (S. cerevisiae)           | 1447362_at   | 4.2         |
| Ccnb3       | cyclin B3                                                                          | 1427744_at   | 2.5         |
| Ccnd2       | cyclin D2                                                                          | 1416124_at   | 4.91        |
| Ccnd3       | cyclin D3                                                                          | 1444323_at   | 6.69        |
| Cdc25a      | cell division cycle 25A                                                            | 1445995_at   | 3.81        |
| Cdkn1b      | cyclin-dependent kinase inhibitor 1B                                               | 1434045_at   | 2.69        |
| Gadd45a     | growth arrest and DNA-damage-inducible 45 alpha                                    | 1449519_at   | 7.16        |
| Gsk3b       | glycogen synthase kinase 3 beta                                                    | 1439931_at   | -2.61       |
| Mcm5        | minichromosome maintenance deficient 5,<br>cell division cycle 46 (S. cerevisiae)  | 1459658_at   | -2.53       |
| Mcm6        | minichromosome maintenance deficient 6<br>(MIS5 homolog, S. pombe) (S. cerevisiae) | 1447756_x_at | 2.14        |
| Rbl1        | retinoblastoma-like 1 (p107)                                                       | 1432604_at   | -2.8        |
| Rbl1        | retinoblastoma-like 1 (p107)                                                       | 1454293_at   | 6.12        |
| Skp2        | S-phase kinase-associated protein 2 (p45)                                          | 1425072_at   | -2.01       |
| Trp53       | transformation related protein 53                                                  | 1459781_x_at | -19.76      |

Supplementary Table S3

Comparison of cell cycle-related gene expressions between MGs with ECs and MGs alone  
(MGs with ECs/MGs alone)

| Gene symbol | Gene name                                                                          | ID           | Fold change |
|-------------|------------------------------------------------------------------------------------|--------------|-------------|
| Bub1        | budding uninhibited by benzimidazoles 1 homolog,<br>(S. cerevisiae)                | 1438571_at   | -2.19       |
| Bub1b       | budding uninhibited by benzimidazoles 1 homolog,<br>beta (S. cerevisiae)           | 1447362_at   | 3.15        |
| Ccna1       | cyclin A1                                                                          | 1449177_at   | 3.21        |
| Ccnb1       | cyclin B1                                                                          | 1419944_at   | -2.32       |
| Ccnb3       | cyclin B3                                                                          | 1427744_at   | -3.03       |
| Ccnd2       | cyclin D2                                                                          | 1416124_at   | 7.83        |
| Ccnd3       | cyclin D3                                                                          | 1444323_at   | 8.34        |
| Ccnd3       | cyclin D3                                                                          | 1438805_at   | -5.44       |
| Ccne1       | cyclin E1                                                                          | 1416492_at   | -2.16       |
| Cdc6        | cell division cycle 6                                                              | 1417019_a_at | -2.47       |
| Cdc25a      | cell division cycle 25A                                                            | 1445995_at   | -2.26       |
| Cdh1        | cadherin 1                                                                         | 1448261_at   | 3.32        |
| Cdkn1b      | cyclin-dependent kinase inhibitor 1B                                               | 1434045_at   | 3.08        |
| Cdkn2a      | cyclin-dependent kinase inhibitor 2A                                               | 1450140_a_at | 3.87        |
| Chk1        | checkpoint kinase 1                                                                | 1420031_at   | -2.8        |
| E2f1        | E2F transcription factor 1                                                         | 1447840_x_at | 2.68        |
| Gadd45a     | growth arrest and DNA-damage-inducible 45 alpha                                    | 1449519_at   | 3.86        |
| Mcm3        | minichromosome maintenance deficient 3 (S. cerevisiae)                             | 1426652_at   | -2.05       |
| Mcm5        | minichromosome maintenance deficient 5,<br>cell division cycle 46 (S. cerevisiae)  | 1415945_at   | -2.03       |
| Mcm6        | minichromosome maintenance deficient 6<br>(MIS5 homolog, S. pombe) (S. cerevisiae) | 1447756_x_at | 2.74        |
| Mpeg1       | macrophage expressed gene 1                                                        | 1427076_at   | 2.54        |
| Rbl1        | retinoblastoma-like 1 (p107)                                                       | 1454293_at   | 7.38        |
| Rbl1        | retinoblastoma-like 1 (p107)                                                       | 1432604_at   | -2.5        |
| Trp53       | transformation related protein 53                                                  | 1438808_at   | -2.1        |

Supplementary Table S4

Comparison of apoptosis-related gene expressions between MGs with ACs and MGs alone  
(MGs with ACs/MGs alone)

| Gene symbol. | Gene name                                                                               | ID           | Fold change |
|--------------|-----------------------------------------------------------------------------------------|--------------|-------------|
| Akt1         | thymoma viral proto-oncogene 1                                                          | 1442759_at   | -2.97       |
| Diablo       | diablo homolog (Drosophila)                                                             | 1425768_at   | -8.78       |
| Fasl         | Fas ligand (TNF superfamily, member 6)                                                  | 1449235_at   | -2.34       |
| Gzmc         | granzyme C                                                                              | 1421256_at   | -3.54       |
| Hrk          | harakiri, BCL2 interacting protein<br>(contains only BH3 domain)                        | 1439854_at   | 3.64        |
| Igf2         | insulin-like growth factor 2                                                            | 1448152_at   | 2.49        |
| Ikbkb        | inhibitor of kappaB kinase beta                                                         | 1432275_at   | -3.11       |
| Irf4         | interferon regulatory factor 4                                                          | 1421174_at   | -4.35       |
| Irf6         | interferon regulatory factor 6                                                          | 14180301_at  | -26.88      |
| Irf7         | interferon regulatory factor 7                                                          | 1417244_a_at | 2           |
| Nfkbie       | nuclear factor of kappa light polypeptide gene enhance<br>in B cells inhibitor, epsilon | 1458299_s_at | 2.93        |
| Tnf          | tumor necrosis factor                                                                   | 1419607_at   | 2.48        |
| Tnfrsf10b    | tumor necrosis factor receptor superfamily, member 10b                                  | 1421296_at   | -3.61       |
| Tnfrsf21     | tumor necrosis factor receptor superfamily, member 21                                   | 1450731_s_at | -9.03       |
| Tnfrsf25     | tumor necrosis factor receptor superfamily, membrane 25                                 | 1422231_a_at | -2.26       |
| Tnfsf10      | tumor necrosis factor (ligand) superfamily, member 10                                   | 1439680_at   | -3.14       |
| Trp53        | transformation related protein 53                                                       | 1459780_at   | 4.17        |
| Trp63        | transformation related protein 63                                                       | 1452027_a_at | -5.77       |
| Trp73        | transformation related protein 73                                                       | 1452325_at   | -2.89       |

Supplementary Table S5

Comparison of apoptosis-related gene expressions between MGs with PCs and MGs alone  
(MGs with PCs/MGs alone)

| Gene symbol | Gene name                                                                              | ID           | Fold change |
|-------------|----------------------------------------------------------------------------------------|--------------|-------------|
| Bcl2        | B cell leukemia/lymphoma 2                                                             | 1457687_at   | 2.03        |
| Birc2       | baculoviral IAP repeat-containing 2                                                    | 1430752_at   | -2.37       |
| Casp3       | caspase 3                                                                              | 1426165_a_at | -2.3        |
| Casp4       | caspase 4, apoptosis-related cysteine peptidase                                        | 1449591_at   | 2.79        |
| Casp6       | caspase 6                                                                              | 1458715_at   | 2.12        |
| Cflar       | CASP8 and FADD-like apoptosis regulator                                                | 1424996_at   | 2.07        |
| Gzmc        | granzyme C                                                                             | 1421256_at   | -10.32      |
| Hells       | helicase, lymphoid specific                                                            | 1453361_at   | -3.88       |
| Igf1        | insulin-like growth factor 1                                                           | 1419519_at   | -5.03       |
| Igf1r       | insulin-like growth factor 1 receptor                                                  | 1452108_at   | 2.27        |
| Ikbkb       | inhibitor of kappaB kinase beta                                                        | 1432275_at   | -2.67       |
| Ikbkg       | inhibitor of kappaB kinase gamma                                                       | 1421208_at   | 2.19        |
| Irf4        | interferon regulatory factor 4                                                         | 1421174_at   | -5.69       |
| Mapk10      | mitogen-activated protein kinase 10                                                    | 1448342_at   | -3.41       |
| Nfkbia      | nuclear factor of kappa light polypeptide gene enhancer<br>in B cells inhibitor, alpha | 1420089_at   | -2.68       |
| Pik3r1      | phosphatidylinositol 3-kinase, regulatory subunit,<br>polypeptide 1 (p85 alpha)        | 1425514_at   | -2.05       |
| Tnf         | tumor necrosis factor                                                                  | 1419607_at   | -3.15       |
| Tnfsf10     | tumor necrosis factor (ligand) superfamily, member 10                                  | 1420412_at   | -3.15       |
| Traf1       | TNF receptor-associated factor 1                                                       | 1445452_at   | -11.02      |
| Trp53       | transformation related protein 53                                                      | 1459781_x_at | -19.76      |
| Trp63       | transformation related protein 63                                                      | 1459581_at   | 8.67        |
| Trp63       | transformation related protein 63                                                      | 1451876_a_at | -4.15       |

Supplementary Table S6

Comparison of apoptosis-related gene expressions between MGs with ECs and MGs alone  
(MGs with ECs/MGs alone)

| Gene symbol | Gene name                                                                                | ID           | Fold change |
|-------------|------------------------------------------------------------------------------------------|--------------|-------------|
| Akt1        | thymoma viral proto-oncogene 1                                                           | 1442759_at   | -6.83       |
| Bcl2        | B cell leukemia/lymphoma 2                                                               | 1437122_at   | 2.04        |
| Bok         | BCL2-related ovarian killer                                                              | 1417040_a_at | 2.15        |
| Casp4       | caspase 4, apoptosis-related cysteine peptidase                                          | 1449591_at   | 2.14        |
| Casp6       | caspase 6                                                                                | 1458715_at   | 2.29        |
| Cflar       | CASP8 and FADD-like apoptosis regulator                                                  | 1424996_at   | 2.02        |
| FasL        | Fas ligand (TNF superfamily, member 6)                                                   | 1418803_a_at | -4.49       |
| Gzmc        | granzyme C                                                                               | 1421256_at   | -5.29       |
| Hells       | helicase, lymphoid specific                                                              | 1453361_at   | -2.35       |
| Hrk         | harakiri, BCL2 interacting protein<br>(contains only BH3 domain)                         | 1439854_at   | 4.3         |
| Igf2        | insulin-like growth factor 2                                                             | 1448152_at   | 2.42        |
| Ikbkb       | inhibitor of kappaB kinase beta                                                          | 1445141_at   | 3.39        |
| Ikbkb       | inhibitor of kappaB kinase beta                                                          | 1432275_at   | -3.96       |
| Ikbkg       | inhibitor of kappaB kinase gamma                                                         | 1421208_at   | 2.12        |
| Irf6        | interferon regulatory factor 6                                                           | 1418301_at   | -3.56       |
| Irf7        | interferon regulatory factor 7                                                           | 1417244_a_at | 5.3         |
| Mapk10      | mitogen-activated protein kinase 10                                                      | 1448342_at   | -11.27      |
| Nfkbia      | nuclear factor of kappa light polypeptide gene enhancer<br>in B cells inhibitor, alpha   | 1420089_at   | -2.29       |
| Nfkbie      | nuclear factor of kappa light polypeptide gene enhancer<br>in B cells inhibitor, epsilon | 1458299_s_at | 2.61        |
| Tnf         | tumor necrosis factor                                                                    | 1419607_at   | -2.28       |
| Tnfsf10     | tumor necrosis factor (ligand) superfamily, member 10                                    | 1420412_at   | 4.6         |
| Tnfsf10     | tumor necrosis factor (ligand) superfamily, member 10                                    | 1439680_at   | -4.22       |
| Tnfrsf10b   | tumor necrosis factor receptor superfamily, member 10b                                   | 1422344_s_at | 2.48        |
| Tnfrsf21    | tumor necrosis factor receptor superfamily, member 21                                    | 1450731_s_at | -2.66       |
| Traf1       | TNF receptor-associated factor 1                                                         | 1445452_at   | -6.57       |
| Trp53       | transformation related protein 53                                                        | 1459781_x_at | -20.55      |
| Trp63       | transformation related protein 63                                                        | 1459581_at   | 3.79        |
| Trp63       | transformation related protein 63                                                        | 1452027_a_at | -5.0        |

Supplementary Table S7

Comparison of MG-related gene expressions between MGs with ACs and MGs alone  
(MGs with ACs/MGs alone)

| Gene symbol | Gene name                                        | ID           | Fold change |
|-------------|--------------------------------------------------|--------------|-------------|
| Cd68        | CD68 antigene                                    | 1449164_at   | -1.02       |
| Cd80        | CD80 antigen                                     | 1451950_a_at | 1.55        |
| Cd86        | CD86 antigen                                     | 1420404_at   | 1.61        |
| Cd163       | CD163 antigen                                    | 1419144_at   | 1.86        |
| Csf1r       | colony stimulating factor 1 receptor             | 1419872_at   | 1.08        |
| Itgam       | integrin alpha M                                 | 1422046_at   | 1.1         |
| Mrc1        | mannose receptor, C type 1                       | 1450430_at   | 1.42        |
| Trem2       | triggering receptor expressed on myeloid cells 2 | 1421792_s_at | 1.06        |
| Tmem119     | transmembrane protein 119                        | 1451344_at   | 1.72        |
| P2ry12      | purinergic receptor P2Y, G-protein coupled 12    | 1431724_a_at | 3.83        |

**Supplementary Table S8**

**Comparison of MG-related gene expressions between MGs with PCs and MGs alone  
(MGs with PCs/MGs alone)**

| <b>Gene symbol</b> | <b>Gene name</b>                                 | <b>ID</b>    | <b>Fold change</b> |
|--------------------|--------------------------------------------------|--------------|--------------------|
| Cd68               | CD68 antigene                                    | 1449164_at   | -1.07              |
| Cd80               | CD80 antigen                                     | 1451950_a_at | 1.37               |
| Cd86               | CD86 antigen                                     | 1420404_at   | 1.74               |
| Cd163              | CD163 antigen                                    | 1419144_at   | -2.5               |
| Csf1r              | colony stimulating factor 1 receptor             | 1419872_at   | -1.37              |
| Itgam              | integrin alpha M                                 | 1422046_at   | 1.4                |
| Mrc1               | mannose receptor, C type 1                       | 1450430_at   | 1.08               |
| Trem2              | triggering receptor expressed on myeloid cells 2 | 1421792_s_at | -1.05              |
| Tmem119            | transmembrane protein 119                        | 1451344_at   | 2.76               |
| P2ry12             | purinergic receptor P2Y, G-protein coupled 12    | 1431724_a_at | 1.28               |

**Supplementary Table S9**

**Comparison of MG-related gene expressions between MGs with ECs and MGs alone  
(MGs with ECs/MGs alone)**

| <b>Gene symbol</b> | <b>Gene name</b>                                 | <b>ID</b>    | <b>Fold change</b> |
|--------------------|--------------------------------------------------|--------------|--------------------|
| Cd68               | CD68 antigene                                    | 1449164_at   | 1.03               |
| Cd80               | CD80 antigen                                     | 1451950_a_at | 1.14               |
| Cd86               | CD86 antigen                                     | 1420404_at   | 1.69               |
| Cd163              | CD163 antigen                                    | 1419144_at   | 3.77               |
| Csf1r              | colony stimulating factor 1 receptor             | 1419872_at   | 1.17               |
| Itgam              | integrin alpha M                                 | 1422046_at   | 1.35               |
| Mrc1               | mannose receptor, C type 1                       | 1450430_at   | 3.09               |
| Trem2              | triggering receptor expressed on myeloid cells 2 | 1421792_s_at | 1.1                |
| Tmem119            | transmembrane protein 119                        | 1451344_at   | 1.86               |
| P2ry12             | purinergic receptor P2Y, G-protein coupled 12    | 1431724_a_at | 2.24               |
